1  
2  
3  
4  
5  
6  
7  
8  
9  
10  
11  
12  
13  
14  
15  
16  
17  
18  
19  
20  
21  
22  
23

## **The SARS-CoV-2 Spike Protein Activates the Epidermal Growth Factor Receptor-Mediated Signaling**

Abdulrasheed Palakkott<sup>1#</sup>, Aysha Alneyadi<sup>1#</sup>, Khalid Muhammad<sup>1</sup>, Ali H. Eid<sup>3</sup>, Khaled Amiri<sup>1,2</sup>, Mohammed Akli Ayoub<sup>1\*</sup>, and Rabah Iratni<sup>1\*</sup>

<sup>1</sup>*Department of Biology, College of Science, United Arab Emirates University, Al Ain PO Box 15551, UAE.*

<sup>2</sup>*Khalifa Center for Biotechnology and Genetic Engineering, United Arab Emirates University, Al Ain PO Box 15551, UAE.*

<sup>3</sup>*Department of Basic Medical Sciences, College of Medicine, QU Health, Qatar University, Doha, Qatar*

# The authors contributed equally to the work.

\* Correspondence:

Mohammed Akli Ayoub (mayoub@uaeu.ac.ae)

Rabah Iratni (R\_iratni@uaeu.ac.ae)

24 **Abstract**

25

26 **Objectives:**

27 The coronavirus disease-19 (COVID-19) pandemic is caused by the novel severe acute  
28 respiratory syndrome coronavirus 2 (SARS-CoV-2). At the molecular and cellular levels,  
29 the SARS-Cov-2 uses its envelope glycoprotein, the spike S protein, to infect the target  
30 cells in the lungs via binding with their transmembrane receptor, the angiotensin-  
31 converting enzyme 2 (ACE2). Here, we wanted to investigate if other molecular targets  
32 and pathways may be used by SARS-Cov-2.

33 **Methods:**

34 We investigated the possibility for the spike 1 S protein and its receptor-binding domain  
35 (RBD) to target the epidermal growth factor receptor (EGFR) and its downstream  
36 signaling pathway *in vitro* using the lung cancer cell line (A549 cells). Protein expression  
37 and phosphorylation was examined upon cell treatment with the recombinant full spike 1  
38 S protein or RBD.

39 **Results:**

40 We demonstrate for the first time the activation of EGFR by the Spike 1 protein  
41 associated with the phosphorylation of the canonical ERK1/2 and AKT kinases and an  
42 increase of survivin expression controlling the survival pathway.

43 **Conclusions:**

44 Our study suggests the putative implication of EGFR and its related signaling pathways  
45 in SARS-CoV-2 infectivity and Covid-19 pathology. This may open new perspectives in  
46 the treatment of Covid-19 patients by targeting EGFR.

47

## 48 **Introduction**

49  
50 The new COVID-19 disease was identified for the first time in December 2019 in the  
51 province of Wuhan in China and it is caused by a new member of coronavirus family  
52 called SARS-CoV-2 (Wang et al., 2020; Zhu et al., 2020; Hu et al., 2021). According to  
53 the latest statistics, over 111 million COVID-19 cases were reported causing around 2.5  
54 million deaths worldwide ([https://www.who.int/emergencies/diseases/novel-coronavirus-](https://www.who.int/emergencies/diseases/novel-coronavirus-2019)  
55 2019).

56 The molecular and cellular basis of the SARS-CoV-2 infection implies the renin-  
57 angiotensin system (RAS) and more importantly its angiotensin-converting enzyme 2  
58 (ACE2) (Li et al., 2003; Tolouian et al., 2020; Hoffmann et al., 2020; Yan et al., 2020;  
59 Tai et al., 2020; Sriram et al., 2020; Hu et al., 2021). ACE2 is a host membrane-bound  
60 metallopeptidase with the catalytic site oriented extracellularly is mostly expressed in  
61 lung, heart, kidney, brain, and gut. In contrast to ACE which converts angiotensin I to  
62 the active vasoconstrictor, angiotensin II (AngII), ACE2 breaks down AngII to  
63 angiotensin-(1–9 and 1–7), which are potent vasodilators, and considered as a negative  
64 regulator of RAS (Lavoie & Sigmund, 2003). The implication of ACE2 in COVID-19 is  
65 thought to occur mostly in the very early stages of the viral infection and COVID-19  
66 pathology. Indeed, SARS-CoV-2-S protein, the spike glycoprotein (protein S), on the  
67 virion surface has been reported to bind the extracellular domain of ACE2 which is used  
68 as a co-receptor for target cell recognition and membrane fusion during the infection  
69 process (Li et al., 2003; Tolouian et al., 2020; Hoffmann et al., 2020; Yan et al., 2020;  
70 Tai et al., 2020; Sriram et al., 2020a; Hu et al., 2021). ACE2 constitutes the main entry  
71 gate for other coronaviruses including the SARS-CoV (Yan et al., 2020). In addition, *in*

72 *vivo* studies showed a nice correlation between COVID-19 infection and the relative  
73 expression of ACE2 (positive) and its activity (negative). Furthermore, the receptor-  
74 binding domain (RBD) in SARS-CoV-2 S protein has been identified and shown to bind  
75 strongly to human and bat ACE2 receptors (Tai et al., 2020). The purified human  
76 recombinant RBD showed a potent competitive action on the binding and, hence, the  
77 attachment of SARS-CoV-2 RBD to ACE2-expressing cells and their infection by the  
78 pseudo virus (Tai et al., 2020; Hu et al., 2021). Thus, the RBD constitutes the most  
79 antigenic entity of the S protein used for the development of vaccines to prevent from  
80 SARS-CoV-2 infection. Several spike-protein and RBD-based vaccines are in clinical  
81 trial (Krammer, 2020).

82

83 The disease severity and mortality of COVID-19 have been reported to be increased in  
84 patients suffering from other chronic diseases such as cancer, diabetes, hypertension  
85 and cardiovascular problems. This was further evidenced in the patients who have been  
86 treated with anti-hypertensive drugs such as ACE inhibitors (ACEIs) and angiotensin  
87 receptor blockers (ARBs)(Sriram et al., 2020a; Mourad & Levy, 2020; Guo et al., 2020;  
88 Gurwitz, 2020; Oliveros et al., 2020; South et al., 2020; Patel & Verma, 2020;  
89 Sommerstein et al., 2020). In parallel, studies have showed that ACEIs and ARBs  
90 resulted in an upregulation of ACE2 and favoring the entry and replication of the virus  
91 (Sommerstein et al., 2020). By contrast, SARS-CoV-2 by targeting ACE2 on the target  
92 cells causes down-regulation and inactivation of the latter. This downregulation  
93 generates an imbalance in favor of an over accumulation of AngII, a potent  
94 vasoconstrictor. Such effect was shown to increase the oxidative damage which leads

95 to inflammation and pulmonary fibrosis (Mascolo et al., 2020). Moreover, inflammation,  
96 cytokine storm, and thrombosis associated with pulmonary injury constitute other  
97 important clinical features of COVID-19 pathology. This suggests the implication of  
98 other molecular actors such as the protease thrombin via its proteinase-activated  
99 receptors (PARs), the purinergic receptors, cytokine receptors, and lipid mediators.  
100 Thus, the inhibition of these pathways has been proposed as a promising therapeutic  
101 approach to prevent thrombotic and inflammatory processes during COVID-19  
102 pathology (Sriram et al., 2020b; Lee et al., 2021).

103

104

105 Although large body of evidence using *in vitro* studies and *in silico* data strongly support  
106 the thesis that ACE2 is necessary for SARS-CoV-2 entry, still, we cannot rule out that  
107 additional factors and/or alternative cell surface receptors may be also implicated in  
108 SARS-CoV-2 entry (Zamorano & Grandvaux, 2020). Among these possible receptors,  
109 the G protein-coupled receptors (GPCRs) and receptor tyrosine kinase (RTKs)  
110 constitutes the valid candidates based on their tissue abundance and pivotal roles in  
111 human and animal physiology. Indeed, several previous studies reported the hijacking  
112 of GPCRs and RTKs and their function by various pathogens during pathogenesis. This  
113 includes microbial pathogens such as bacteria and viruses such as the SARS-CoV and  
114 the adrenergic receptor and the epidermal growth factor receptor (EGFR) as the targets  
115 (Wiedemann et al., 2016; Venkataraman & Frieman, 2017; Mitchell et al., 2019). Thus,  
116 we hypothesize that during SARS-CoV-2 infectivity, the virus may also use EGFR  
117 expressed on the epithelial lung cells as the receptor/co-receptor target for its entry.

118 Here, we have examined the effect of the SARS-COV-2 full-length and DRB Spike 1  
119 protein on the activation of EGFR and its related downstream signaling pathways  
120 consisting of AKT and ERK1/2 phosphorylation in the lung cancer cells (A549).

121

## 122 **Materials and Methods**

### 123 **Cell culture, chemicals and antibodies**

124 The lung cancer cells (A549) used in this study were obtained from Cell Line Service  
125 (CLS)-GmbH and were maintained in RPMI (Cat. # 00506 Gibco, Life Technologies,  
126 Rockville, UK) complemented with 10% fetal bovine serum (FBS) (Cat. # 02187 Gibco,  
127 Life Technologies, Rockville, UK) and 100 U/ml penicillin streptomycin glutamine (Cat. #  
128 01574 Gibco, Life Technologies, Rockville, UK). AG1478 (Cat. # 141438) was  
129 purchased from Abcam, Cambridge, UK. Antibodies against phospho-EGFR (Cat. #  
130 4407), EGFR (Cat. # 4267), phospho-ERK1/2 (Cat. # 9106), ERK1/2 (Cat. # 4695),  
131 phospho-AKT (Cat. # 9271), AKT (Cat. # 9272), Survivin (Cat. # 2803), anti-mouse  
132 (Cat. # 7076), and anti-rabbit (Cat. # 7074) were purchased from Cell Signaling,  
133 Technology, Danvers, Massachusetts USA. SARS-COV-2 spike protein 1 (Cat. #  
134 DAGC091) was purchased from Creative Diagnostics, Shirley, NY, USA. SARS-COV-2  
135 spike RBD protein (Cat. # 40592-V08B) was purchased from Sino Biological, Beijing  
136 China. Human EGF Recombinant Protein (Cat. # PHG0313) was purchased from  
137 Gibco, Life Technologies, Rockville, UK.

138

### 139 **Whole Cell extract and Western Blotting analysis**

140 Cells ( $0.5 \times 10^6$ ) were seeded per well in 60 mm culture dish and cultured for 24h before  
141 treatment. After treatment with or without EGF, spike 1 protein or Spike RBD protein,  
142 cells were washed twice with ice-cold PBS, scraped, pelleted, and lysed in RIPA buffer  
143 (Pierce) supplemented with protease inhibitor cocktail (Roche) and phosphatase  
144 inhibitor (Roche). After incubation for 30 min on ice, cell lysates were centrifuged at

145 14,000 rpm for 20 min at 4°C. Protein concentration of lysates was determined by BCA  
146 protein assay kit (Thermo Scientific) and the lysates were adjusted with lysis buffer.  
147 Aliquots of 25 µg of total cell lysate were resolved onto 6-15% SDS-PAGE. Proteins  
148 were transferred to nitrocellulose membranes (Thermo Scientific) and blocked for 1 h at  
149 room temperature with 5% non-fat dry milk in TBST (TBS and 0.05% Tween 20).  
150 Incubation with specific primary antibodies was performed in blocking buffer overnight at  
151 4°C and this was true for all the primary protein antibodies used in this study. Notice that  
152 all the lysates were freshly loaded when different phospho-proteins were analyzed.  
153 However, the same membrane of the phospho-protein was stripped to examine the  
154 corresponding total protein loaded except for pERK1/2 where the proteins were always  
155 freshly loaded due to stronger anti-pERK1/2 binding. Moreover, a β-actin blot was also  
156 used in parallel to double check that similar amount of proteins were loaded in every  
157 gel's lane. Horseradish peroxidase-conjugated anti-IgG was used as secondary  
158 antibody. Immunoreactive bands were detected by ECL chemiluminescent substrate  
159 (Thermo-Scientific) and chemiluminescence was detected using the LiCOR C-DiGit blot  
160 scanner and Image Studio Light Software.  
161



## 162 **Results**

### 163 **Spike and RBD activate EGFR, AKT, and ERK1/2 in A549 cells**

164 First, we examined the effect of Spike 1 and RBD on the phosphorylation status of  
165 EGFR and its related kinases, AKT and ERK1/2, in lung cancer cells (A549) (**Figure 1**).  
166 The treatment of cells for 5 minutes with Spike (2.5  $\mu\text{g/ml}$ ) promoted a strong  
167 phosphorylation of EGFR, AKT, and ERK1/2, which was either similar (EGFR and  
168 ERK1/2) or even higher (AKT) to that promoted by stimulation with the maximal dose of  
169 EGF (5  $\mu\text{g/ml}$ ) (**Figure 1**). On the other hand, RBD (5  $\mu\text{g/ml}$ ) under a similar condition  
170 showed almost no effect on EGFR phosphorylation while it significantly induced AKT  
171 and ERK1/2 phosphorylation (**Figure 1**). This result suggests the specific targeting of  
172 EGFR by the full spike 1 protein of SARS-COV-2 but not by its RBD. Also, our data  
173 suggest that RBD-mediated AKT and ERK1/2 activation is independent on EGFR  
174 activation and that other molecular targets and/or intracellular mechanisms may be  
175 involved.

176 We next performed time-course analysis with both Spike 1 and RBD on the  
177 phosphorylation status of EGFR and ERK1/2. For this, A549 cells were treated with  
178 Spike 1 (2.5  $\mu\text{g/ml}$ ) (**Figure 2A**) or RBD (5  $\mu\text{g/ml}$ ) (**Figure 2B**) for 5, 15, 30, and 60  
179 minutes. Stimulation with EGF (5  $\mu\text{g/ml}$ ) as a positive control was carried out for 15  
180 minutes. As shown in **Figure 2A**, Spike 1 induced a rapid and a transient  
181 phosphorylation of EGFR and ERK1/2 with a pic at 5 minutes of stimulation and sharp  
182 decrease after 15 minutes. Spike 1-mediated AKT activation, on the other hand, was  
183 also observed upon 5 minutes of stimulation but this was more sustained in time  
184 (**Figure 2A**). For RBD, there was no clear EGFR phosphorylation induced regardless of

185 the stimulation time (**Figure 2B**). This is consistent with our observation in **Figure 1B**.  
186 However, RBD promoted rapid and strong activation of both ERK1/2 and AKT that  
187 remained persistent even after 60 minutes of stimulation (**Figure 2B**).  
188 Together, these data further confirm the specific activation of EGFR by Spike 1, but not  
189 RBD, but they also demonstrate the implication of additional and/or different  
190 mechanisms in AKT and ERK1/2 activation whether cells were activated by Spike 1 or  
191 RBD.

192

### 193 **Activation of AKT by Spike 1 and RBD is EGFR-dependent**

194 Next, we decided to further explore the targeting of EGFR and its related downstream  
195 AKT survival pathway by Spike 1 and RBD by using the selective EGFR antagonist,  
196 AG1478. As shown in **Figure 3A**, the pre-treatment of A549 cells with AG1478 (10  $\mu$ M)  
197 fully blocked EGFR phosphorylation induced by stimulation with EGF (5  $\mu$ g/ml)  
198 indicating the specificity of the response. We found that, AG1478 completely abolished  
199 AKT phosphorylation induced by EGF, Spike 1, or RBD (**Figure 3B**). This finding  
200 strongly suggests that Spike 1- and RBD-mediated AKT phosphorylation is dependent  
201 on EGFR activation.

202

### 203 **Effects of Spike 1 and RBD on the cell survival marker, survivin**

204 Since EGFR, AKT, and ERK1/2 pathways are known for their role in cell proliferation  
205 and cell survival, we wanted to link our data on the phosphorylation status of these  
206 proteins especially EGFR and AKT with the induction of the anti-apoptotic protein,  
207 survivin, which belongs to the inhibitor of apoptosis (IAP) family and considered as the

208 key marker for the activation of the survival pathway in cells. Moreover, the activation of  
209 survivin was shown to be induced by both AKT and ERK1/2 signaling in cells. For this,  
210 we wanted to test whether Spike- and RBD-mediated activation of ERK1/2 and AKT  
211 was associated with the induction of surviving expression. Toward this, A549 cells were  
212 treated with Spike 1 (2.5  $\mu\text{g/ml}$ ) (**Figure 4A**) or RBD (5  $\mu\text{g/ml}$ ) (**Figure 4B**) for 5, 15, 30,  
213 and 60 minutes using the stimulation 15 minutes with EGF (5  $\mu\text{g/ml}$ ) as a positive  
214 control and the level of surviving was determined by Western Blot. We found that both  
215 Spike 1 (**Figure 4A**) and RBD (**Figure 4B**) induced a marked increase of survivin  
216 expression in a time-dependent manner with a maximal response at 30 and 60 minutes.  
217 These observations demonstrate that Spike 1- and RBD-promoted EGFR/AKT pathway  
218 in A549 cells is associated with the activation of survivin that may promote the survival  
219 of the SARS-Cov-2-infected lung cancer cells.

220

## 221 **Discussion**

222 In this study, we report for the first time the possible targeting of EGFR and its related  
223 downstream signaling pathways by SARS-Cov-2 Spike 1 protein and its RBD in lung  
224 cancer cells (A549). We demonstrated that Spike 1-induced AKT activation occurred in  
225 EGFR-dependent manner since it was drastically blocked by AG1478. On the other  
226 hand, we found that Spike 1 and RBD also elicited the activation of the survival pathway  
227 in A549 cells. Indeed, both Spike 1 and RBD induced the expression and the activation  
228 of the anti-apoptotic protein, survivin, which belongs to the inhibitor of apoptosis (IAP)  
229 family and considered as the key marker for the activation of the survival pathway in  
230 cancer cells. Such a response was very consistent with the phosphorylation of AKT in  
231 these cancer cells. This may constitute a solid molecular and cellular rationale to

232 explain the increased risk of infectivity by SARS-Cov-2 and its severity in cancer  
233 patients as recently reported by several groups (Albiges et al., 2020; Dai et al., 2020).  
234 Regarding the implication of our findings in the pathophysiology of COVID-19, recent  
235 studies showed that cancer patients were more vulnerable to the SAR-COV-2 infection.  
236 Although COVID-19 was reported to have low death rate ~2% in the general population,  
237 patients with cancer and COVID-19, have at least 3-fold increase in the death rate. Dai  
238 et al., 2020 showed that patients with lung cancer, gastrointestinal cancer or breast  
239 cancer had the highest frequency of critical symptoms including highest death rates.  
240 Patients with lung cancer and gastrointestinal cancer had a death rate of 18.18% and  
241 7.69%, respectively (Dai et al., 2020). Interestingly, they showed that cancer patients  
242 that received targeted therapy that includes the EGFR-tyrosine kinase inhibitors showed  
243 the lowest death rate compared to cancer patients who received immunotherapy,  
244 chemotherapy or surgery (Albiges et al., 2020). Another study carried out in Gustave  
245 Roussy Cancer Centre (France) by Albiges et al., 2020 showed that 27% of the cancer  
246 patients with COVID-19 developed clinical worsening and 17.4% died (Albiges et al.,  
247 2020). Here we showed that SAR-COV-2 activates the EGFR and its downstream  
248 signaling pathways controlling cell survival and proliferation. We also found that the  
249 inhibition of EGFR abolished the SARS-COV-2 activation of AKT.

250 At the molecular level, our *in vitro* data provide, for the first time, the evidence that  
251 SARS-Cov-2 Spike 1 protein activating EGFR and its downstream signaling pathways,  
252 AKT and ERK1/2. This is very consistent with the well-established concept of the  
253 hijacking of cell surface receptors and their activity/signaling by pathogens including  
254 viruses (Sodhi et al., 2004; Zhang et al., 2016; ; Ranadheera et al., 2018; Mitchell et al.,

255 2019) and bacteria (Coureuil et al., 2010; Wiedemann et al., 2016). This implies that  
256 pathogens use GPCRs and RTKs at the cell surface of the target cells during the  
257 infection process leading to their entry in the target cells. Interestingly, previous studies  
258 also showed the role of EGFR and its downstream signalling pathways in  
259 viruses/bacteria pathogenicity being consistent with our findings on SARS-Cov-2 spike  
260 protein (Mitchell et al., 2019; Wiedemann et al., 2016). Indeed, EGFR was shown to be  
261 important during influenza infection (Mitchell et al., 2019). In addition, similarly to our  
262 data, the Salmonella Rck membrane protein has been reported to bind and to activate  
263 EGFR and its mediated signalling resulting in receptor/bacteria co-internalization and  
264 cell infection (Wiedemann et al., 2016). This also occurs with GPCRs since both viruses  
265 and bacteria were demonstrated to bind and activate GPCRs resulting in the co-  
266 internalization of viruses (Sodhi et al., 2004) or bacteria (Coureuil et al., 2010;  
267 Wiedemann et al., 2016) with the target receptors. As stated above, we showed that the  
268 Spike 1-induced AKT activation occurred in EGFR-dependent manner in A549 cells  
269 since it was blocked by EGFR blockade (AG1478). This supports the conclusion that  
270 the activation by Spike 1 of the AKT/survival axis depends on EGFR activation (**Figure**  
271 **5**). Moreover, the differential effects of Spike 1 and RBD suggests different mode of  
272 activation and/or molecular pathways involved. One possible explanation is that Spike 1  
273 may directly target EGFR while RBD uses other targets at the cancer cell surface  
274 including ACE2 resulting in AKT and ERK1/2 phosphorylation independently on EGFR  
275 (**Figure 5**). Overall, our data are consistent with direct targeting of EGFR/AKT pathway,  
276 but this does not rule out the alternative pathway consisting of the implication of the  
277 canonical ACE2 pathway via transactivation of EGFR at the cell surface or intracellular

278 crosstalk between their intracellular pathways (**Figure 5**). Of course, further studies are  
279 required to demonstrate whether Spike 1 protein directly binds to EGFR or not and what  
280 would be the implication of the canonical ACE2 pathway. Even though, we did not  
281 investigate all the aspects of EGFR-dependent pathways and SARS-Cov-2 infectivity,  
282 we believe that our data will pave the way towards further investigation the exact role of  
283 EGFR in SARS-Cov-2 infection and pathogenicity.

284

285 **Author Contributions:**

286 AP, HA, MK performed the Western blot experiments; KA and AEH helped analyzing  
287 the data; RI and MAA designed the project, analyzed the data and wrote the  
288 manuscript. All authors reviewed the manuscript.

289

290 **Funding:**

291 This work was supported by the UAEU Research Office grant (RIMA-2020) to M.A.A.  
292 and R.I.

293

294 **Conflicts of Interest:**

295 The authors declare no conflict of interest.

296

297 **Ethical approval statement:**

298

299 The authors declare no ethical approval was needed for this study.

300

301 **References**

- 302
- 303 Albiges L, Foulon S, Bayle A et al. Determinants of the outcomes of patients with cancer  
304 infected with SARS-CoV-2: results from the Gustave Roussy cohort. *Nat Cancer* (2020)  
305 **1**:965–975 <https://doi.org/10.1038/s43018-020-00120-5>  
306
- 307 Coureuil M, Lécuyer H, Scott MG, Boularan C, Enslin H, Soyer M, Mikaty G,  
308 Bourdoulous S, Nassif X, Marullo S. Meningococcus Hijacks a  $\beta$ 2-adrenoceptor/ $\beta$ -  
309 Arrestin pathway to cross brain microvasculature endothelium. *Cell* (2010) **143**:1149-60.  
310 doi: 10.1016/j.cell.2010.11.035  
311
- 312 Dai M, Liu D, Liu M, Zhou F, Li G, Chen Z, Zhang Z, You H, Wu M, Zheng Q, Xiong Y,  
313 Xiong H, et al. Patients with Cancer Appear More Vulnerable to SARS-CoV-2: A  
314 Multicenter Study during the COVID-19 Outbreak. *Cancer Discov* (2020) **10**:783-791.  
315 doi: 10.1158/2159-8290.CD-20-0422  
316
- 317 Guo J, Huang Z, Lin L, Lv J. Coronavirus Disease 2019 (COVID-19) and Cardiovascular  
318 Disease: A Viewpoint on the Potential Influence of Angiotensin-Converting Enzyme  
319 Inhibitors/Angiotensin Receptor Blockers on Onset and Severity of Severe Acute  
320 Respiratory Syndrome Coronavirus 2 Infection. *J Am Heart Assoc* (2020) **9**:e016219.  
321 doi: 10.1161/JAHA.120.016219  
322
- 323 Gurwitz D. Angiotensin receptor blockers as tentative SARS-CoV-2 therapeutics. *Drug*  
324 *development research* (2020) **81**:537–540. <https://doi.org/10.1002/ddr.21656>  
325
- 326 Hoffmann M, Kleine-Weber H, Schroeder S, Krüger N, Herrler T, Erichsen S,  
327 Schiergens TS, Herrler G, Wu NH, Nitsche A, Müller MA, Drosten C, Pöhlmann S.  
328 SARS-CoV-2 Cell Entry Depends on ACE2 and TMPRSS2 and Is Blocked by a  
329 Clinically Proven Protease Inhibitor. *Cell* (2020) **181**:271-280.e8. doi:  
330 10.1016/j.cell.2020.02.052  
331
- 332 Hu B, Guo H, Zhou P. et al. Characteristics of SARS-CoV-2 and COVID-19. *Nat Rev*  
333 *Microbiol* (2021) **19**:141–154. <https://doi.org/10.1038/s41579-020-00459-7>  
334
- 335 Krammer, F. SARS-CoV-2 vaccines in development. *Nature* (2020) **586**:516–527.  
336 <https://doi.org/10.1038/s41586-020-2798-3>  
337
- 338 Lavoie JL, Sigmund CD. Minireview: overview of the renin-angiotensin system--an  
339 endocrine and paracrine system. *Endocrinology* (2003) **144**:2179-83. doi:  
340 10.1210/en.2003-0150.  
341
- 342 Lee CH. Role of specialized pro-resolving lipid mediators and their receptors in virus  
343 infection: a promising therapeutic strategy for SARS-CoV-2 cytokine storm. *Arch Pharm*  
344 *Res* (202) **44**:84-98. doi: 10.1007/s12272-020-01299-y  
345



- 346 Li W, Moore MJ, Vasilieva N, Sui J, Wong SK, Berne MA, Somasundaran M, Sullivan  
347 JL, Luzuriaga K, Greenough TC, Choe H, Farzan M. Angiotensin-converting enzyme 2  
348 is a functional receptor for the SARS coronavirus. *Nature* (2003) **426**:450-4. doi:  
349 10.1038/nature02145
- 350  
351 Mascolo A, Scavone C, Rafaniello C, Ferrajolo C, Racagni G, Berrino L, Paolisso G,  
352 Rossi F, Capuano A. Renin-Angiotensin System and Coronavirus Disease 2019: A  
353 Narrative Review. *Front Cardiovasc Med* (2020) **7**:143. doi: 10.3389/fcvm.2020.00143
- 354  
355 Mitchell HD, Einfeld AJ, Stratton, KG, Heller, NC, Bramer, LM, Wen J, McDermott, J. E.,  
356 Gralinski, L. E., Sims, A. C., Le, M. Q., Baric, R. S., Kawaoka, Y., & Waters, K. M. The  
357 Role of EGFR in Influenza Pathogenicity: Multiple Network-Based Approaches to  
358 Identify a Key Regulator of Non-lethal Infections. *Frontiers in cell and developmental*  
359 *biology* (2019) **7**:200. <https://doi.org/10.3389/fcell.2019.00200>
- 360  
361 Mourad, JJ., Levy, B.I. Interaction between RAAS inhibitors and ACE2 in the context of  
362 COVID-19. *Nat Rev Cardiol* (2020) **17**:313. <https://doi.org/10.1038/s41569-020-0368-x>
- 363  
364 Oliveros E, Oni ET, Shahzad A, Kluger AY, Lo KB, Rangaswami J, McCullough PA.  
365 Benefits and Risks of Continuing Angiotensin-Converting Enzyme Inhibitors,  
366 Angiotensin II Receptor Antagonists, and Mineralocorticoid Receptor Antagonists during  
367 Hospitalizations for Acute Heart Failure. *Cardiorenal Med* (2020) **10**:69-84. doi:  
368 10.1159/000504167
- 369  
370 Patel AB, Verma A. COVID-19 and Angiotensin-Converting Enzyme Inhibitors and  
371 Angiotensin Receptor Blockers: What Is the Evidence? *JAMA* (2020) May **323**:1769-  
372 1770. doi: 10.1001/jama.2020.4812
- 373  
374 Ranadheera C, Coombs KM, Kobasa D. Comprehending a Killer: The Akt/mTOR  
375 Signaling Pathways Are Temporally High-Jacked by the Highly Pathogenic 1918  
376 Influenza Virus. *EBioMedicine* (2018) **32**:142-163. doi: 10.1016/j.ebiom.2018.05.027
- 377  
378 Sodhi A, Montaner, S, Gutkind J. Viral hijacking of G-protein-coupled-receptor signalling  
379 networks. *Nat Rev Mol Cell Biol* (2004) **5**:998–1012. <https://doi.org/10.1038/nrm1529>
- 380  
381 Sommerstein R, Kochen MM, Messerli FH, Gräni C. Coronavirus Disease 2019  
382 (COVID-19): Do Angiotensin-Converting Enzyme Inhibitors/Angiotensin Receptor  
383 Blockers Have a Biphasic Effect? *J Am Heart Assoc* (2020) **9**:e016509. doi:  
384 10.1161/JAHA.120.016509
- 385  
386 South AM, Tomlinson L, Edmonston D, Hiremath S, Sparks MA. Controversies of renin-  
387 angiotensin system inhibition during the COVID-19 pandemic. *Nat Rev Nephrol* (2020)  
388 **16**:305-307. doi: 10.1038/s41581-020-0279-4
- 389

- 390 Sriram K, Loomba R, Insel PA. Targeting the renin-angiotensin signaling pathway in  
391 COVID-19: Unanswered questions, opportunities, and challenges. *Proc Natl Acad Sci*  
392 *USA* (2020) **117**:29274-29282. doi: 10.1073/pnas.2009875117  
393
- 394 Sriram K, Insel PA. Inflammation and thrombosis in COVID-19 pathophysiology:  
395 Proteinase-activated and purinergic receptors as drivers and candidate therapeutic  
396 targets. *Physiol Rev* (2020). doi: 10.1152/physrev.00035.2020  
397
- 398 Tai W, He L, Zhang X, Pu J, Voronin D, Jiang S, Zhou Y, Du L. Characterization of the  
399 receptor-binding domain (RBD) of 2019 novel coronavirus: implication for development  
400 of RBD protein as a viral attachment inhibitor and vaccine. *Cell Mol Immunol* (2020)  
401 **17**:613-620. doi: 10.1038/s41423-020-0400-4  
402
- 403 Tolouian R, Zununi Vahed S, Ghiyasvand S, Tolouian A, Ardalan MR. COVID-19  
404 interactions with angiotensin-converting enzyme 2 (ACE2) and the kinin system; looking  
405 at a potential treatment. *J Renal Inj Prev.* (2020) **9**:e19. doi: 10.34172/jrip.2020.19  
406
- 407 Venkataraman T, Frieman MB. The role of epidermal growth factor receptor (EGFR)  
408 signaling in SARS coronavirus-induced pulmonary fibrosis. *Antiviral Res.* 2017  
409 Jul;143:142-150. doi: 10.1016/j.antiviral.2017.03.022.  
410
- 411 Wang C, Horby PW, Hayden FG, Gao GF. A novel coronavirus outbreak of global  
412 health concern. *Lancet* (2020) **395**:470-473. doi: 10.1016/S0140-6736(20)30185-9  
413
- 414 Wiedemann A, Mijouin L, Ayoub MA, Barilleau E, Canepa S, Teixeira-Gomes AP, Le  
415 Vern Y, Rosselin M, Reiter E, Velge P. Identification of the epidermal growth factor  
416 receptor as the receptor for Salmonella Rck-dependent invasion. *FASEB J.* (2016)  
417 **30**:4180-4191. doi: 10.1096/fj.201600701R  
418
- 419 Yan R, Zhang Y, Li Y, Xia L, Guo Y, Zhou Q. Structural basis for the recognition of  
420 SARS-CoV-2 by full-length human ACE2. *Science* (2020) **367**:1444-1448. doi:  
421 10.1126/science.abb2762  
422
- 423 Zamorano Cuervo N, and Grandvaux, N. ACE2: Evidence of role as entry receptor for  
424 SARS-CoV-2 and implications in comorbidities. *eLife* (2020) **9**:e61390.  
425 <https://doi.org/10.7554/eLife.61390>  
426
- 427 Zhang J, Feng H, Xu S, Feng P. Hijacking GPCRs by viral pathogens and tumor.  
428 *Biochemical pharmacology* (2016) **114**:69–81. <https://doi.org/10.1016/j.bcp.2016.03.021>  
429
- 430 Zhu N, Zhang D, Wang W, Li X, Yang B, Song J, Zhao X, Huang B, Shi W, Lu R, et al.  
431 China Novel Coronavirus Investigating and Research Team. A Novel Coronavirus from  
432 Patients with Pneumonia in China, 2019. *N Engl J Med.* (2020) **382**:727-733. doi:  
433 10.1056/NEJMoa2001017  
434
- 435

436

437

## 438 **Figures Legend**

439

440 **Figure 1. Effect of SARS-COV-2 Spike 1 protein on EGFR, AKT and ERK1/2**

441 **activation.** A549 cells were treated or not with EGF (5 µg/mL) for 15 min or with full-

442 length Spike 1 (2.5 µg/mL) or with RBD (5 µg/mL) protein for 5 min then whole-cell

443 extracts were subjected to western blot analysis for pEGFR, pAKT, pERK1/2 and their

444 respective total levels.

445

446 **Figure 2. Time-course accumulation of pEGFR and pERK1/2 in A549 cells treated**

447 **with full length Spike 1 protein and its RBD.** Cells were treated or not with

448 2.5 µg/mL of full length Spike 1 protein (**A**) or 5 µg/mL of RBD (**B**) at different times as

449 indicated (5, 15, 30 and 60 min) and the protein levels of pEGFR and pERK1/2 and their

450 respective total levels were determined by western blot. The treatment with EGF (5

451 µg/mL) was carried out for 15 min.

452

453 **Figure 3. Blockade of EGFR inhibits SARS-COV-2 spike 1-mediated activation of**

454 **AKT in A549 cells.** A549 were first pre-treated with AG1478 (10 µM) for 15 min prior to

455 treatment with EGF (**A** and **B**), full-length spike 1 protein (**B**), or RBD (**B**) as described

456 in **Figure 1**. Whole cell extracts were resolved on SDS-PAGE and protein levels were

457 determined by western blot.

458

459 **Figure 4. SARS-COV-2 full length spike 1 protein and its RBD promote survivin**  
460 **expression in A549 cells.** A549 cells were treated or not with EGF (5  $\mu$ g/mL) (**A** and  
461 **B**), full-length spike 1 protein (2.5  $\mu$ g/mL)(**A**), or RBD (5  $\mu$ g/mL)(**B**) at different times  
462 (5, 15, 30 and 60 min) as indicated and the protein level of survivin was determined by  
463 western blot.

464

465 **Figure 5. Speculative model for the targeting of EGFR and its downstream**  
466 **signaling by SARS-COV-2 spike 1 protein in A549 cells.**

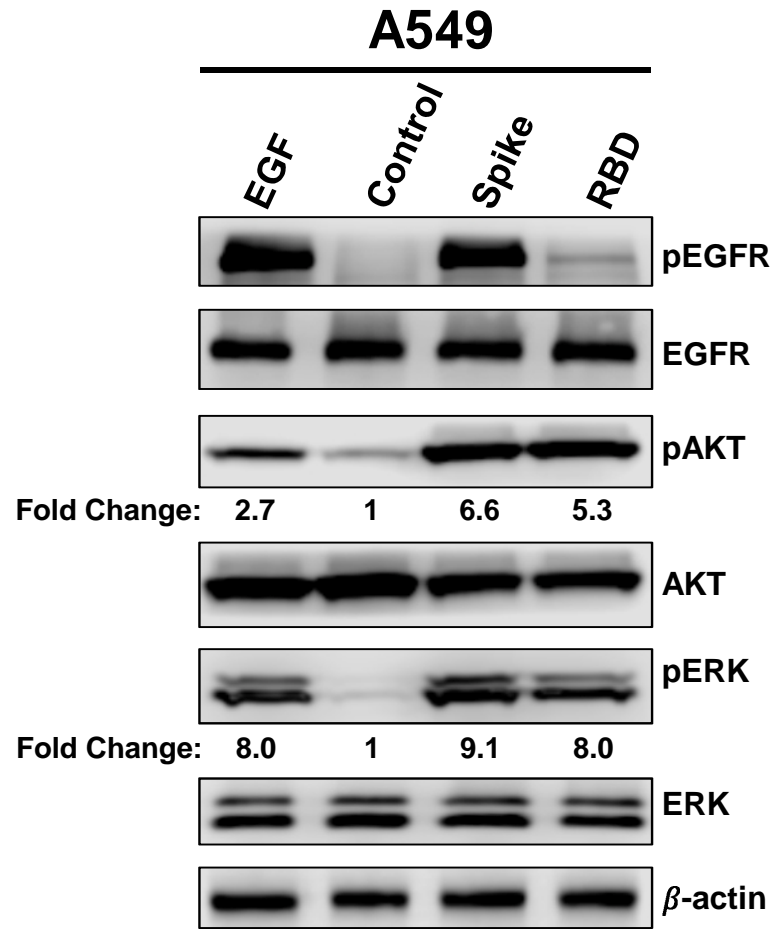

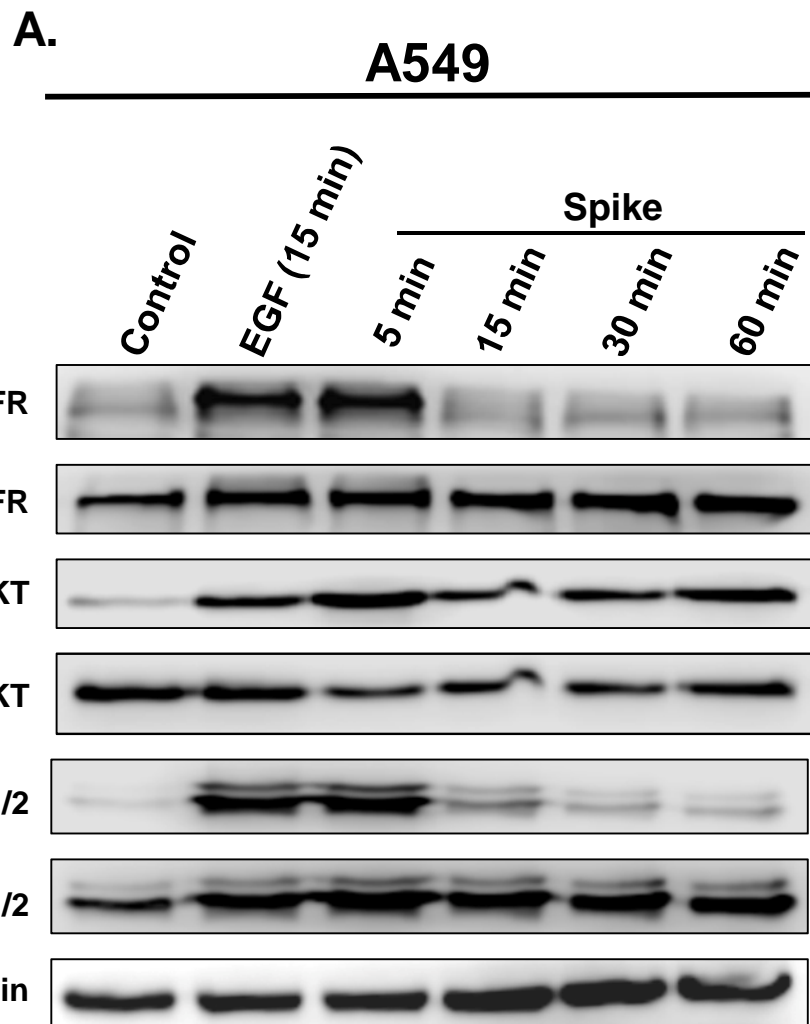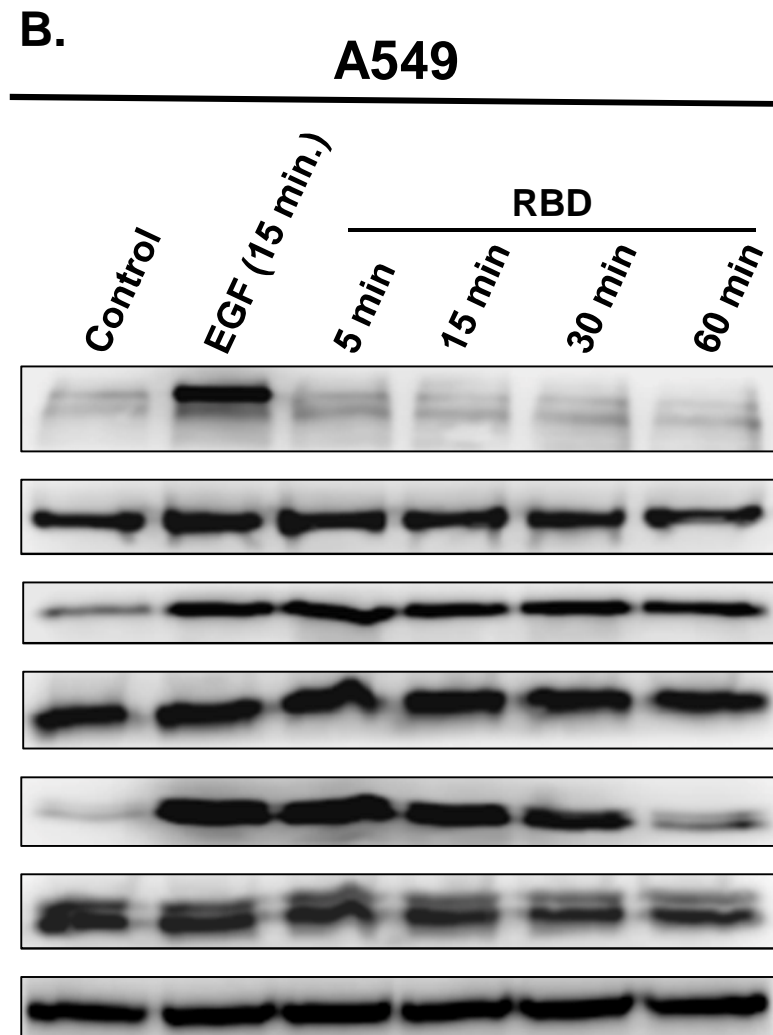

**A.**

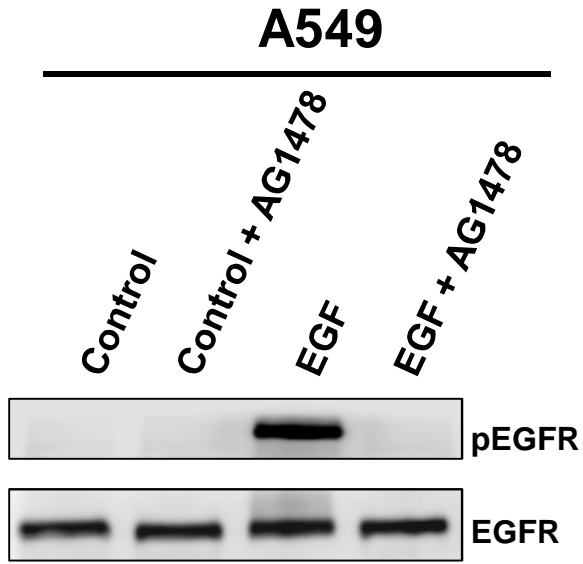

**B.**

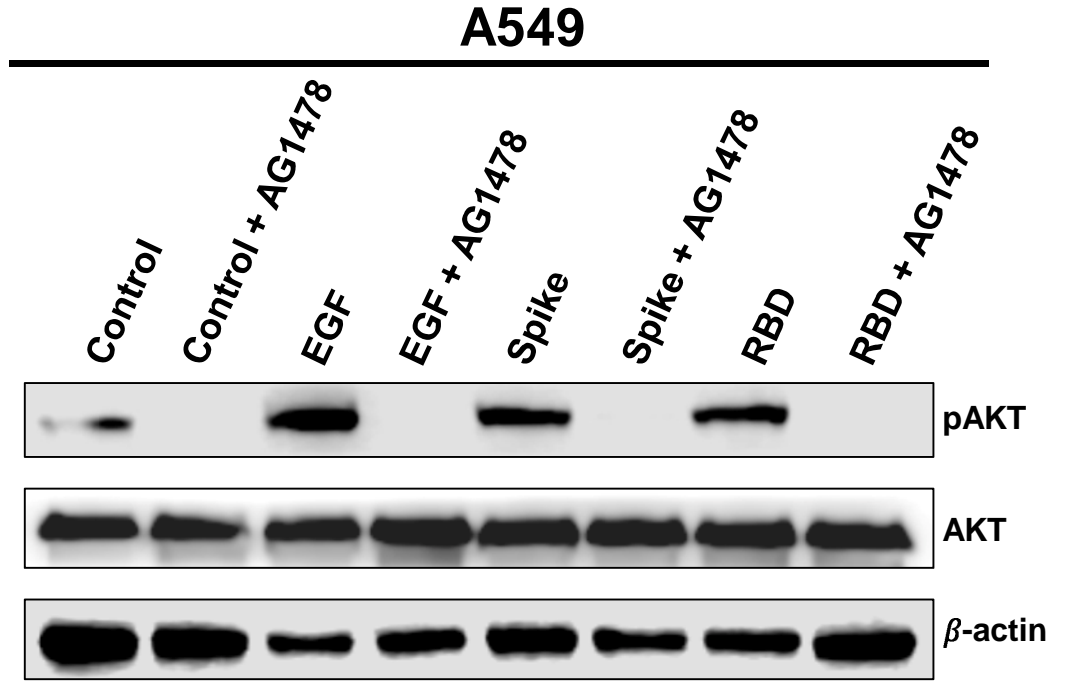

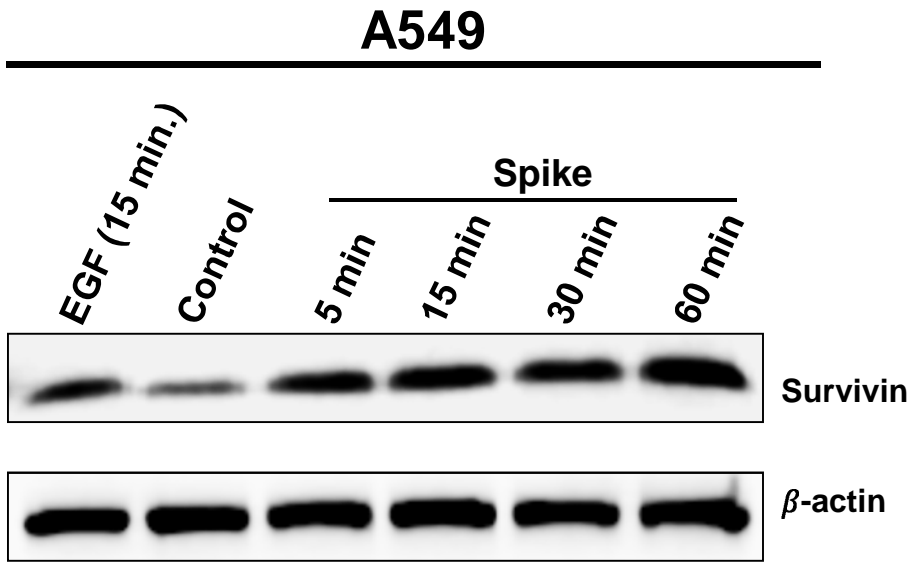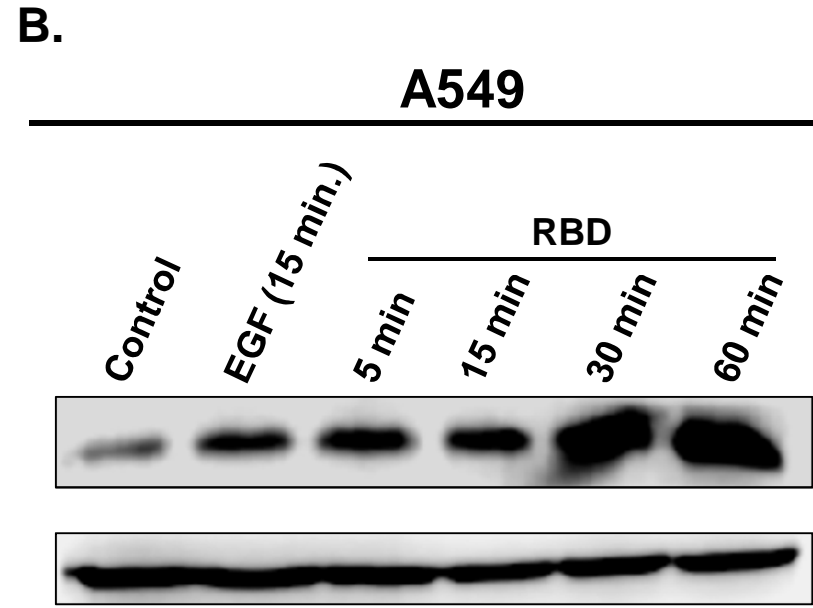



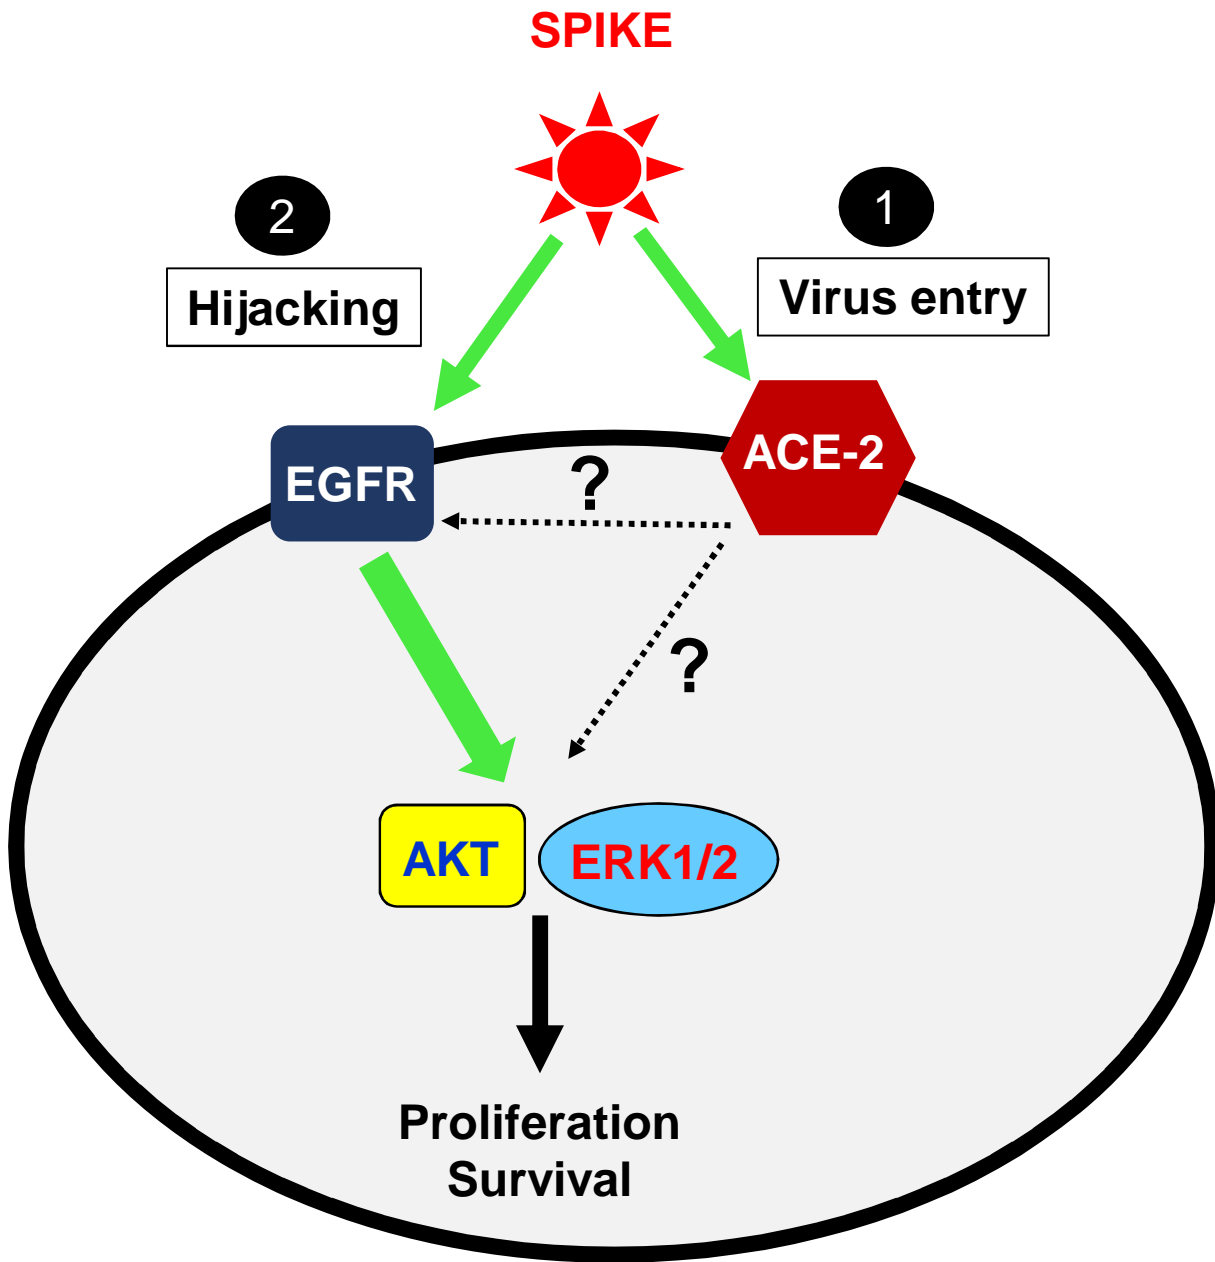

Source: https://www.biorxiv.org/content/10.1101/2022.05.10.491351v1.full.pdf
